1

2 **Sequence features of MADS-domain proteins that act as hubs in the**  
3 **protein-protein interaction network controlling flower development**

4

5 Florian Rümpler<sup>a</sup>, Günter Theißen<sup>a,1,\*</sup> and Rainer Melzer<sup>a,b,1,\*</sup>

6 <sup>a</sup> *Department of Genetics, Friedrich Schiller University Jena, Philosophenweg 12,*  
7 *D-07743 Jena, Germany*

8 <sup>b</sup> *School of Biology and Environmental Science, University College Dublin, Belfield,*  
9 *Dublin 4, Ireland*

10 <sup>1</sup> *Contributed equally to this project*

11 <sup>\*</sup> *For correspondence (e-mail: [guenter.theissen@uni-jena.de](mailto:guenter.theissen@uni-jena.de); [rainer.melzer@ucd.ie](mailto:rainer.melzer@ucd.ie))*

12

13

14

15 **Key Words**

16 *Amborella trichopoda, Arabidopsis thaliana, Coiled-coil; Floral quartet; Keratin-like domain;*

17 *Leucine-zipper; MIKC-type protein; SEPALLATA3; Transcription factor*

18 **ABSTRACT**

19 Protein-protein interaction networks (PPIs) are usually scale-free networks that contain a  
20 small number of highly connected nodes (hubs) and many poorly connected nodes. However,  
21 the molecular mechanisms that underlie the promiscuous interactions of hub proteins remain  
22 largely unknown. Here, we show that the floral homeotic MADS-domain transcription factor  
23 *SEPALLATA3* from *Arabidopsis thaliana* can act as a hub in the PPI controlling flower  
24 development because it contains leucine residues at inter- and intramolecular interaction  
25 interfaces. Comprehensive sequence analyses of diverse MADS-domain proteins indicate  
26 exceedingly high conservation of the identified leucine residues within *SEPALLATA*-  
27 subfamily proteins, whereas non-hub MADS-domain proteins exhibit preferences for other  
28 amino acids at homologous sites. Our results indicate that the conservation of leucine residues  
29 at positions critical for protein-protein interactions contributed significantly to the present-day  
30 structure of the PPI and may have facilitated the evolution of the flower.

31 Complexity of biological systems is often achieved by the combinatorial activity of a small  
32 number of factors <sup>1</sup>. One important example are protein-protein interaction networks (PPIs)  
33 that are based on transcription factors (TFs) that act in a combinatorial manner to accomplish  
34 the required degree of e.g. morphological complexity. PPIs are often scale-free networks.  
35 They contain a small number of hub proteins with many interaction partners and a large  
36 number of poorly connected nodes. Though combinatorial control is of eminent importance  
37 for almost all developmental processes, the molecular determinants that are underlying the  
38 specific combinatorial interactions remain poorly understood. This is especially true for  
39 protein-protein interactions among TFs belonging to the same family. The respective TFs are  
40 often very similar in terms of sequence and biochemical properties yet fulfill highly distinct  
41 and specific functions which are at least partially determined by distinct protein-protein  
42 interactions. The PPI controlling flower development in angiosperms is a good case in point.  
43 Floral organ specification is regulated by so called floral quartets which are organ specific  
44 tetrameric complexes of MIKC-type MADS-domain TFs bound to two adjacent DNA-binding  
45 sites while looping the DNA to regulate target genes <sup>2, 3, 4, 5, 6, 7</sup>. In the model plant species  
46 *Arabidopsis thaliana* the floral homeotic protein SEPALLATA3 (SEP3) together with its  
47 paralogs SEP1, SEP2 and SEP4 from the closely related LOFSEP-subfamily bears a central  
48 role by forming tetrameric complexes with numerous other MIKC-type MADS-domain TFs <sup>5,</sup>  
49 <sup>8, 9, 10</sup>. The four SEP proteins act in a largely redundant manner but in agreement with their  
50 central position in the PPI controlling flower development *sep* multiple mutants show severe  
51 developmental defects <sup>3, 4</sup>. *sep1 sep2 sep3* triple mutant plants develop sepals from primordia  
52 that would normally develop into petals, stamens and carpels and *sep1 sep2 sep3 sep4*  
53 quadruple mutants develop vegetative leaves instead of floral organs <sup>3, 4</sup>.

54 Among the four SEP genes, SEP3 has been studied best <sup>5, 6, 8, 9, 11, 12</sup>. Beyond the formation of  
55 complexes that determine floral organ identity SEP3 is also involved in controlling flowering  
56 time, floral transition and ovule development <sup>8, 11, 13, 14</sup>. It does therefore constitute one of the  
57 major hub proteins within the PPI controlling reproductive development <sup>8, 9, 11, 13</sup>. However, it  
58 is unclear which biochemical and biophysical properties enable SEP3 to interact with  
59 numerous partners whereas other MIKC-type MADS-domain TFs show a much narrower  
60 interaction spectrum. For example, the floral homeotic proteins APETALA3 (AP3) and  
61 PISTILLATA (PI) from *A. thaliana* that are involved in the developmental specification of  
62 petals and stamens do only form obligate heterodimers and require SEP proteins for tetramer  
63 formation <sup>5, 8, 15</sup>.

64 The protein-protein interactions that allow for tetramer formation are mainly mediated by the  
65 about 80 amino acids long keratin-like domain (K-domain), which is shared by all MIKC-type  
66 MADS-domain TFs<sup>5, 16, 17</sup>. The amino acid sequence within the K-domain of most MADS-  
67 domain proteins shows three characteristic heptad repeat patterns (K1-; K2-; K3-subdomain  
68 repeat) of the form [abcdefg]<sub>n</sub>, where most 'a' and 'd' positions are occupied by highly  
69 hydrophobic residues<sup>16, 17, 18</sup>. This sequence feature is typical for coiled-coils, a common and  
70 intensively studied type of protein-protein interaction domains<sup>19, 20, 21, 22</sup> (Fig. 1). Within a  
71 coiled-coil, an  $\alpha$ -helix is formed and the amino acids on heptad repeat 'a' and 'd' positions  
72 form a stripe of hydrophobic residues that runs along the  $\alpha$ -helix and facilitates hydrophobic  
73 interaction with a partner coiled-coil<sup>20, 21</sup>.

74 Recently the crystal structure of the complete K-domain of SEP3 was reported<sup>23</sup>. Based on  
75 the crystal structure, the K-domain forms two amphipathic  $\alpha$ -helices separated by a kink  
76 region which prevents intramolecular association of both helices. Helix one comprises the  
77 first heptad repeat (K1-subdomain) and is involved in dimerisation of two SEP3 monomers.  
78 Helix two spans heptad repeat two (K2-subdomain) that further stabilizes the interaction of  
79 two SEP3 monomers and heptad repeat three (K3-subdomain) which constitutes an interface  
80 for the interaction of two SEP3 dimers i.e. tetramerisation (Fig. 1). In this study, we determine  
81 sequence features that enable SEP3 to form tetrameric complexes and identify the amino acid  
82 patterns that distinguish members of the SEP3- and LOFSEP-protein subfamilies (termed SEP  
83 subfamily henceforth for simplicity) from other MIKC-type MADS-domain TFs with more  
84 restricted interaction capabilities. Our data suggest that leucine residues at intramolecular  
85 contact points and at the interaction interface of the K3-subdomain are indispensable for  
86 tetrameric complex formation. Those leucines are highly conserved in the SEP subfamily but  
87 much less frequent in e.g. AP3- and PI-subfamily MIKC-type MADS-domain TFs. They may  
88 thus be a critical denominator that determines the ability of SEP-subfamily proteins to act as a  
89 hub protein in the scale free PPI controlling flower development.

## 90 **RESULTS**

### 91 **Leucine residues in the K-domain strongly influence cooperative DNA-binding of SEP3**

92 To investigate the relevance of the different K-subdomains for cooperative DNA-binding and  
93 tetramer formation, single and double amino acid substitutions to proline were performed.  
94 Proline was chosen because it is known to possess helix-breaking properties <sup>24, 25</sup>. For each of  
95 the three K-subdomains two substitution mutants were created (Fig. 2a, Supplementary  
96 Fig. 1). Based on coiled-coil predictions one substitution mutant was supposed to destroy the  
97 K-subdomain coiled-coil (L115P for K1-, L131P-L135P for K2- and L164P for K3-  
98 subdomain, respectively) whereas the other one was expected to not alter the formation of the  
99 respective coiled-coil (S94P (K1); L145P (K2); G178P (K3)). Beyond the three K-  
100 subdomains, we also introduced proline substitutions at positions occupied by two conserved  
101 hydrophobic amino acids in the interhelical region between the K1- and the K2-subdomain  
102 (L120P and L123P, Fig. 2a) because positions homologous to L120 and L123 have been  
103 shown to be important for the interaction of MADS-domain proteins <sup>17</sup>.

104 We used electrophoretic mobility shift assays (EMSAs) to study the DNA-binding and  
105 tetramerisation behavior of the mutant SEP3 proteins. Based on previous studies it is known  
106 that SEP3 binds as homodimer to a DNA-element termed CArG-box (for CCAr-richGG;  
107 consensus sequence 5'-CC(A/T)<sub>6</sub>GG-3') and that four SEP3 proteins bind to a DNA probe  
108 containing two CArG-boxes <sup>6</sup>. To first investigate whether DNA-binding affinities of  
109 individual dimers were affected by the different amino acid substitutions, we performed  
110 saturation binding EMSA experiments using increasing amounts of a DNA probe containing  
111 only one CArG-box together with constant amounts of protein as previously described <sup>12</sup>. The  
112 estimated affinities for binding of the altered SEP3 proteins to a single DNA-binding site  
113 varied slightly but did not considerably differ from the values obtained for SEP3 wild type  
114 protein (Supplementary Fig. 2, Supplementary Table 1), indicating that the different amino  
115 acid substitutions did not or only marginally affect DNA-binding of individual dimers.

116 If increasing amounts of SEP3 were incubated together with constant amounts of a DNA  
117 probe containing two CArG-boxes, three bands of different electrophoretic mobility were  
118 observed (Fig. 2b left side). As determined previously <sup>6</sup> the band of high electrophoretic  
119 mobility constitutes unbound DNA (indicated with '0' in Fig. 2b), the band of intermediate  
120 electrophoretic mobility constitutes a DNA probe bound by two SEP3 proteins ('2') and the  
121 band of low electrophoretic mobility constitutes a DNA probe bound by four SEP3

122 proteins ('4'). By analyzing the signal intensities of the three different fractions the ability of  
123 SEP3 to form DNA-bound tetrameric complexes can be quantified and expressed via the  
124 cooperativity constant  $k_{coop}$  (equation (4) in Methods).  $k_{coop}$  equals 1 for non-cooperative  
125 binding and increases with increasing tetramer formation capabilities of the examined protein.  
126 SEP3 wild type protein always showed a highly cooperative DNA-binding although the  
127 degree of cooperativity varied between different experiments and was slightly higher than  
128 previously estimated <sup>6, 12</sup>, probably owing to difficulties to precisely determine high  $k_{coop}$   
129 values (Fig. 2b and d, Supplementary Table 1).

130 In contrast to the wild type protein, all of the leucine-to-proline substitution mutants of SEP3  
131 (L115P; L120P-L123P; L131P-L135P; L145P; L164P) showed a considerably reduced ability  
132 to bind cooperatively to DNA *in vitro*, independent of whether the formation of coiled-coils  
133 was predicted to be affected or not (Fig. 2c and d, Supplementary Table 1). Only the two  
134 proline substitutions S94P and G178P, located at the N- and C-terminal borders of the K-  
135 domain, respectively, did not strongly reduce cooperative binding of SEP3.

136 To test the effect of amino acid substitutions that are supposed to have a less severe effect on  
137 helix formation than proline, we substituted a subset of the previously selected leucines  
138 (L115; L145; L164) by alanine. Surprisingly, of these 3 substitutions only L145A showed a  
139 cooperative DNA-binding ability comparable to that of SEP3 wild type protein, whereas  
140 substitutions L115A and L164A caused an almost complete loss of cooperative DNA-binding,  
141 comparable to the proline substitutions at the respective positions (Fig. 2d, Supplementary  
142 Table 1). We further substituted position L164 by three additional amino acids (L164E;  
143 L164W; L164I) comprising glutamate and tryptophan which occur at position 164 in several  
144 members of the SEP subfamily and isoleucine which has very similar physicochemical  
145 properties to leucine. However, none of the resulting mutants was able to approach SEP3 wild  
146 type cooperative binding strength (Fig. 2d, Supplementary Table 1). Our results indicate that  
147 the examined leucine residues are of critical importance for tetramer formation and  
148 cooperative binding of SEP3.

149 Within the [abcdefg]<sub>n</sub> heptad repeat of the K3-subdomain of SEP3 two neighboring 'a'  
150 positions (E161; N168) are not occupied by hydrophobic amino acids. Substituting these  
151 positions by leucine (E161L-N168L) resulted in a higher probability for the formation of the  
152 K3-subdomain coiled-coil *in silico* (Supplementary Fig. 1). The respective mutant protein  
153 showed a cooperativity at least as high as the wild type protein in EMSAs. In contrast to the  
154 wild type protein, repeated measurements yielded  $k_{coop}$  values that consistently were above

155 200 (Fig. 2d, Supplementary Table 1). In fact, in none of the performed EMSAs a signal of a  
156 DNA probe bound by only one protein dimer was detected, an observation that was different  
157 from the other proteins for which high cooperativity in DNA-binding was detected (e.g.  
158 SEP3-WT and SEP3-L145A) indicating that cooperative binding was increased by the  
159 E161L-N168L substitutions (Supplementary Fig. 3). Surprisingly, when we performed  
160 saturation binding EMSA experiments using increasing amounts of a DNA probe containing  
161 only one CARG-box the mutant protein SEP3-E161L-N168L exhibited no binding of  
162 individual dimers. Instead a signal of low electrophoretic mobility occasionally occurred for  
163 high amounts of applied DNA probe that might constitute a protein DNA complex consisting  
164 of more than two proteins (Supplementary Fig. 4).

### 165 **Mutations in a distantly related ortholog of SEP3 have very similar effects on** 166 **cooperative DNA-binding as in SEP3**

167 The SEP3 ortholog AMtrAGL9 from the early diverging angiosperm *Amborella trichopoda*<sup>15</sup>  
168 forms homotetrameric protein-DNA complexes with a cooperative binding affinity  
169 comparable to SEP3 (Fig. 2e, Supplementary Fig. 5). AMtrAGL9 amino acid position I141 is  
170 homologous to SEP3 L145 and is thus located in the K2-subdomain heptad repeat of  
171 AMtrAGL9 (Fig. 2a). Substitution to alanine at that position interfered to some extent with  
172 cooperative binding capabilities whereas substitution to proline at position I141 results in an  
173 almost complete loss of cooperative binding (Fig. 2e, Supplementary Table 1). If amino acid  
174 position L160 of AMtrAGL9, which is homologous to position L164 in the center of the K3-  
175 subdomain of SEP3, is exchanged by proline or alanine, the ability of AMtrAGL9 to  
176 cooperatively bind to DNA is almost completely lost in either case, a behavior that is similar  
177 to that observed for SEP3 (compare Fig. 2d and e).

### 178 **Interacting sites are more often occupied by leucine in SEP-subfamily proteins than in** 179 **proteins of other MIKC-type subfamilies**

180 The importance of leucine residues for the tetramerisation ability of SEP3 and AMtrAGL9  
181 raised the question as to which extent these positions are conserved within the SEP subfamily  
182 and which amino acid preferences members of other MIKC-type protein subfamilies show at  
183 homologous sites. We therefore created a multiple sequence alignment based on 1,325  
184 sequences of MIKC-type MADS-domain proteins belonging to 14 subfamilies and  
185 comprising sequences from a diverse array of seed plants. Despite the high evolutionary  
186 distance of the sampled taxa, the sequences aligned almost without gaps throughout the



187 complete K-domain (i.e. without potential insertions or deletions). The only exception were  
188 PI-subfamily protein sequences, among which a deletion of four amino acids within the C-  
189 terminal half of the K-domain was very common. This deletion within the PI-lineage most  
190 likely occurred after early diverging angiosperms branched off, as most of the sampled PI-  
191 subfamily sequences from early diverging angiosperms still possess those four amino acids.

192 We first compared the conservation of sites that are homologous to the 15 residues that (based  
193 on the crystal structure of SEP3) mediate the hydrophobic intra- and intermolecular  
194 interactions in the SEP3 homotetramer<sup>23</sup> to the overall conservation of the K-domain. We  
195 found that within the SEP3 subfamily, sites that are homologous to interacting sites in the  
196 SEP3 homotetramer are significantly less variable than the remaining residues of the K-  
197 domain (Fig. 3a). This conservation pattern also holds true for sequences of all other 13  
198 subfamilies of MIKC-type MADS-domain proteins (Fig. 3b, Supplementary Fig. 6a) as well  
199 as for sequences from gymnosperms to core eudicots (Supplementary Fig. 6b). Beyond this  
200 similar pattern of conserved positions also the amino acid properties in terms of  
201 hydrophobicity at homologous sites appear highly similar among all examined subfamilies  
202 (Supplementary Fig. 7), suggesting that the overall structure of the K-domain as determined  
203 for SEP3 is conserved among MIKC-type proteins of most if not all subfamilies and  
204 throughout seed plants.

205 Next we analyzed the amino acid distribution at sites homologous to the 12 leucine residues  
206 (L101, L108, L115, L120, L123, L128, L131, L135, L154, L157, L164 and L171) that  
207 contribute to inter- and intramolecular interactions in a SEP3 homotetramer (Fig. 4a)<sup>23</sup>. All  
208 these residues were found to be highly conserved within the 78 examined SEP3-subfamily  
209 sequences; 8 out of 12 positions were completely invariable (Fig. 4b). In contrast to this,  
210 members of other subfamilies (e.g. AP3- and PI-subfamily proteins) often show preferences  
211 for other amino acids on equivalent sites (Fig. 4b, Supplementary Fig. 8). Especially positions  
212 equivalent to L154, L157 and L164 of SEP3 that are located within the center of the  
213 tetramerisation interface are often not occupied by leucines in AP3- and PI-subfamily  
214 proteins. The high conservation of leucines also becomes apparent within LOFSEP-subfamily  
215 proteins (comprising SEP1, SEP2 and SEP4 from *A. thaliana*) which form the sister group of  
216 SEP3-subfamily proteins and that are assumed to function in a mostly redundant manner with  
217 SEP3 during flower development (Fig. 4c)<sup>3, 4, 10</sup>. The closest relatives of the SEP subfamily  
218 are AGL6-subfamily proteins followed by AP1-subfamily proteins<sup>26</sup>. However, despite the  
219 close relationship AGL6- as well as AP1-subfamily proteins display a considerably lower



220 leucine frequency especially on sites within the tetramerisation interface (Fig. 4c,  
221 Supplementary Fig. 8). Instead, these positions are more frequently occupied by other  
222 hydrophobic amino acids such as isoleucine and methionine. It has previously been shown  
223 that within a coiled-coil, leucine packs very well at heptad repeat 'd' positions and enables the  
224 formation of a tight dimeric coiled-coil as it becomes apparent in a leucine-zipper<sup>22, 27</sup>. In  
225 contrast other hydrophobic amino acids such as isoleucine or valine lead to steric hindrance at  
226 heptad repeat 'd' positions<sup>22</sup> (Fig. 4d).

### 227 **Insertion of leucine residues into the K3-subdomain of AP3 facilitates** 228 **homotetramerisation of the chimeric protein SEP3<sub>AP3chim</sub>**

229 Based on our data we hypothesized that the overall structure of the K-domain is conserved  
230 throughout most if not all subfamilies of MIKC-type MADS-domain proteins and that  
231 preferences for different amino acids on interacting sites account for subfamily specific  
232 interaction patterns. We aimed to test our hypothesis with help of the chimeric protein  
233 SEP3<sub>AP3chim</sub>, in which we substituted the K3-subdomain (i.e. tetramerisation interface) of  
234 SEP3 (residues 150-181) by the homologous sites of AP3 (Fig. 5a and b). AP3 is known to  
235 form obligate heterodimers with PI and is thus not able to form DNA-binding homodimers or  
236 homotetramers<sup>28, 29</sup>. As expected, the chimeric protein SEP3<sub>AP3chim</sub> showed a complete loss of  
237 homotetramerisation capabilities compared to SEP3 wild type protein in EMSA experiments  
238 (Fig. 5c and d right side, Supplementary Table 1). Although the K3-subdomains of SEP3 and  
239 AP3 share only four identical residues at homologous sites the sequence similarity in terms of  
240 hydrophobicity on most heptad repeat 'a' and 'd' positions is comparatively high (Fig. 5a).  
241 However, two heptad repeat 'd' positions occupied by leucine in SEP3 (L157 and L164) are  
242 occupied by threonine and glutamine in AP3, respectively (Fig. 5a). Both leucines are highly  
243 conserved throughout SEP3-subfamily proteins whereas homologous sites in AP3-subfamily  
244 proteins are almost exclusively occupied by residues other than leucine (Fig. 4b). We thus  
245 substituted positions T157 and Q164 of the chimeric protein by leucine and tested the ability  
246 of the resulting mutants to form homotetramers. Both single amino acid substitutions could  
247 not improve tetramerisation ability of the chimeric protein (Supplementary Table 1).  
248 However, the insertion of both leucine residues into the K3-subdomain of SEP3<sub>AP3chim</sub>  
249 sufficed to fully 'restore' the ability to form DNA-binding homotetramers (Fig. 5e right side).  
250 Visualizing the amino acid sequence of the tetramerisation interface of SEP3 and AP3 in a  
251 helical wheel diagram illustrates how residues M150, L157, L164 and L171 form a strong  
252 hydrophobic stripe within the tetramerisation interface of SEP3, whereas the hydrophobic

253 stripe is interrupted by threonine and glutamine in AP3 (Fig. 5c and d left side). Substituting  
254 both residues by leucine closes the gap within the hydrophobic stripe and most likely thereby  
255 facilitates homotetramerisation (Fig. 5e left side).

## 256 DISCUSSION

257 Tetramer formation among MIKC-type MADS-domain transcription factors is of central  
258 importance for flower development<sup>5, 7, 8, 9, 30</sup>. However, knowledge about the molecular  
259 determinants facilitating tetramer formation remains scarce. Our data indicate that substitution  
260 of leucines in the K-domain of SEP3 did almost invariably lead to a strong reduction in  
261 tetramer formation abilities (Fig. 2). This was expected for leucine to proline substitutions  
262 within the helical regions of the K-domain as proline has helix-breaking properties. However,  
263 also the rather conservative substitution from leucine to alanine in the tetramerization  
264 interface (L164A) affected cooperative binding and tetramerization strongly. Similar results  
265 have been obtained for substituting other leucine residues in the tetramerization interface by  
266 alanine<sup>23</sup>.

267 The question arises as to why specifically leucine residues are favoured over other  
268 hydrophobic amino acid residues. The tetramerization interface forms coiled-coils and it is  
269 well established that complex ‘knobs-into-holes’ side chain interactions within the  
270 hydrophobic core determine the strength of the interaction between coiled-coils<sup>19</sup>. Numerous  
271 studies on energetic contributions of different hydrophobic amino acids inside the  
272 hydrophobic core revealed that  $\beta$ -branched amino acids (e.g. isoleucine or valine) as well as  
273 amino acids with small side chains (e.g. alanine) in heptad repeat ‘d’ positions have a strong  
274 destabilizing effect on formation of parallel dimeric coiled-coils<sup>27, 31</sup>. The local  
275 stereochemical environment at heptad repeat ‘d’ positions instead strongly favours  $\gamma$ -branched  
276 amino acids for intermolecular interactions, making leucines uniquely suited at these sites<sup>22,</sup>  
277<sup>27, 29, 31</sup>. This is in line with the observation that L145, which is located at a heptad repeat ‘d’  
278 position but according to structural data not involved in intermolecular interactions<sup>23</sup> can be  
279 mutated to alanine without a decrease in tetramer formation capabilities. In contrast, L164  
280 (also at a heptad repeat ‘d’ position but involved in intermolecular interactions) mutation to  
281 alanine leads to a strong decrease in tetramerization. In addition, L145 is by far not as  
282 conserved as leucines involved in interactions (Supplementary Fig. 8).

283 A decrease in tetramer formation was also observed for substitution of leucines in the kink  
284 region between the two helices, where an effect on helix formation was not predicted  
285 (Supplementary Fig. 1). However, although the leucine residues in the kink are not directly  
286 involved in tetramer formation, they interact intramolecularly with each other to stabilize the  
287 kink and thus bring the tetramer interface in a favourable position for protein-protein  
288 interactions<sup>23</sup>. It is likely that substitutions to proline or alanine in the kink region altered or

289 destabilized the orientation of the tetramerisation interface and thus impeded tetramer  
290 formation indirectly. Similar to the leucines at interacting sites within the helical regions of  
291 the K-domain stereochemical restrictions may also in this case favour leucines over other  
292 hydrophobic amino acids. This may explain why the L115A mutation in the kink region,  
293 which presumably only affects intramolecular interactions, caused a decrease in tetramer  
294 formation capabilities.

295 Taken together, these findings indicate that inter- and intramolecular hydrophobic interactions  
296 specifically among leucines are of critical importance for SEP3 homotetramerization. This  
297 principle does very likely apply to the entire subfamily of SEP proteins, as leucines at  
298 interaction positions are evolutionarily highly conserved throughout this subfamily (Fig. 4).  
299 The evolutionary conserved and important role of leucines is further highlighted by the  
300 observation that in the SEP3 ortholog AMtrAGL9 from *A. trichopoda* leucines at positions  
301 homologous to those in SEP3 were also of critical importance for tetramer formation (Fig. 2).

302 The K-domain is the second highest conserved domain of MIKC-type proteins (the most  
303 highly conserved domain is the MADS-domain)<sup>32</sup>. Previous structural predictions indicated  
304 that the K-domain is forming coiled-coils in most if not all MIKC-type proteins<sup>18, 23, 33</sup>. Our  
305 analyses indeed strongly support this view. The chemical properties of amino acids that are of  
306 importance for intra- and intermolecular interactions in SEP3 are conserved in MIKC-type  
307 proteins from all of the 14 subfamilies analysed here. This indicates that most K-domains fold  
308 in a structure similar to that determined for SEP3 and that residues that are homologous to  
309 interacting sites in the SEP3 homotetramer may also constitute intra- and intermolecular  
310 contact points in most other protein family members.

311 However, although the chemical properties of amino acids important for interactions were  
312 conserved in subfamilies other than SEP, their identity was not always. Whereas the vast  
313 majority of leucine residues important for intra- and intermolecular interactions is highly  
314 conserved within the SEP subfamily, leucine residues are observed at a clearly lower  
315 frequency in other subfamilies (Fig. 4, Supplementary Fig. 4). This indicates that, although  
316 the overall structure of the K-domain is conserved in all MIKC-type proteins, their  
317 tetramerization capabilities may vary depending on the presence of leucines on critical  
318 interaction sites. For example, AP3 and PI, who do not possess leucines on all inter- and  
319 intramolecular contact points, are unable to form tetramers not involving SEP3<sup>5, 9</sup>. Indeed, the  
320 K3-subdomain of AP3, which is not capable of mediating homotetramer formation, gained  
321 this ability when placed in the SEP3 protein context and two leucines were introduced

322 (Fig. 4). Thus, we speculate that leucines at intra- and intermolecular contact points may not  
323 only be necessary but also sufficient for tetramer formation of MIKC-type proteins.

324 Intriguingly, the high conservation of leucines in the K-domain of SEP-subfamily proteins  
325 and their importance for homotetramer formation correlates very well with the crucial  
326 function of those proteins as hubs within the PPI controlling flower development. In addition,  
327 proteins like AP3 and PI that have less central positions within the interaction network also  
328 lack leucines at several positions critical for tetramerization. It thus appears plausible that  
329 leucines in SEP-subfamily proteins are not only important for homotetramer formation but  
330 also play a pivotal role in the formation of heterotetrameric complexes. For example, though a  
331 lack of leucines in the kink region of many MIKC-type proteins may destabilizes the  
332 orientation of the tetramerization interface and prevents homotetramer formation, the high  
333 structural stability of the K-domain of SEP-subfamily proteins that is brought about by  
334 intramolecular leucine interactions may serve as a scaffold that helps to align the interaction  
335 interface of partner proteins and hence facilitate heterotetramer formation.

336 The pattern of leucines at the tetramerization interface may be explained in a similar manner.  
337 Though data on the interaction of leucines at heptad repeat 'd' positions with other amino  
338 acids at 'd' positions in a heteromeric coiled-coil are scarce, data from leucine zippers  
339 indicate that beyond leucine-leucine interactions also interactions of leucines with a number  
340 of other amino acids are more favourable than most other interactions not involving any  
341 leucine<sup>34</sup>.

342 Taken together, we propose that the leucine residues in SEP-subfamily proteins serve to  
343 facilitate heterotetrameric interactions while at the same time the absence of leucines in the  
344 interaction partners prevents homotetramer formation or formation of heterotetramers not  
345 involving SEP-subfamily proteins. This way, SEP-subfamily proteins could act as hubs in the  
346 scale free PPI controlling flower development: tetramerization of many proteins depends on  
347 them and probably cannot occur in the absence of SEP-subfamily proteins.

348 We previously proposed that the dependence of other MIKC-type proteins on SEP-subfamily  
349 proteins for tetramer formation facilitated the concerted development of the different floral  
350 organs and the evolution of the flower as a single reproductive entity<sup>15</sup>. The evolutionary  
351 conservation of leucines in the SEP subfamily as opposed to most other subfamilies may be  
352 thus one important molecular mechanism that fostered the evolution of the flower.

353 Importantly, however, coiled-coil interactions are very complex, with amino acids occupying  
354 heptad repeat 'a', 'd', 'e' and 'g' position playing key roles in determining the affinity and  
355 specificity of an interaction<sup>20, 21, 35</sup> and we are far from completely understanding the  
356 implications of sequence variations on the different positions for MIKC-type protein  
357 interactions. For example, polar and charged residues are observed at heptad repeat 'd'  
358 positions in a number of MIKC-type protein subfamilies and those would be expected to not  
359 only hinder homotetramerization but also heterotetramerization with SEP-subfamily proteins.  
360 Furthermore, subfamily specific patterns of charged residues at heptad repeat 'e' and 'g'  
361 positions can be observed that may account for differences in interaction specificity. Although  
362 our findings bring us one step closer towards solving the code for floral quartet-like complex  
363 formation, additional structural and biophysical analyses are required to more completely  
364 understand the molecular mechanisms and evolutionary patterns of MIKC-type protein  
365 interactions. This will eventually also lead to a better understanding as to why this  
366 transcription factor family expanded in seed plants and plays a role in virtually every  
367 reproductive developmental process.

368

## 369 **METHODS**

### 370 **Cloning procedures and site-directed mutagenesis.**

371 The plasmids for *in vitro* transcription/translation of *SEP3*, *AP3*, *PI* and *AMtrAGL9* (pTNT-  
372 *SEP3*, pSPUTK-*AP3*, pSPUTK-*PI* and pSPUTK-*AMtrAGL9*) have been generated  
373 previously<sup>6, 15</sup>. The cDNA sequences for the single- and double amino acid substitution  
374 mutants of *SEP3* were created by site-directed mutagenesis PCR according to the Q5 Site-  
375 Directed Mutagenesis Manual (New England Biolabs). The cDNA sequence for the chimeric  
376 protein *SEP3*<sub>AP3chim</sub> was created by megaprimer-mediated mutagenesis PCR for domain  
377 substitutions according to<sup>36</sup>.

### 378 **Design of DNA probes and radioactive labeling.**

379 Design and preparation of DNA probes have been described previously<sup>6</sup>. The CARG-box  
380 sequence 5'-CCAAATAAGG-3' that was used for all DNA probes was derived from the  
381 regulatory intron of *AGAMOUS*. For studies on homotetramer formation a 151 nt long DNA  
382 probe was used that contained two CARG-boxes in a distance of 63 bp, i.e. 6 helical turns  
383 (sequence: 5'- TCGAG GTCGG AAATT TAATT ATATT CCAAA TAAGG AAAGT  
384 ATGGA ACGTT CGACG GTATC GATAA GCTTG ATGAA ATTTA ATTAT ATTCC  
385 AAATA AGGAA AGTAT GGAAC GTTAT CGAAT TCCTG CAGCC CGGGG GATCC  
386 ACTAG TTCTA G -3', CARG-box sequences are underlined). Saturation binding assays to  
387 quantify dimer binding affinities were performed with a 51 nt long DNA probe harboring a  
388 single CARG-box in the center (sequence: 3'- AATTC GAAAT TTAAT TATAT TCCAA  
389 ATAAG GAAAG TATGG AACGT TGAAT T- 5', CARG-box sequence is underlined). The  
390 DNA probes were radioactively labeled via Klenow fill-in reaction of 5'-overhangs with [ $\alpha$ -  
391 <sup>32</sup>P] dATP.

### 392 ***In vitro* transcription/translation and electrophoretic mobility shift assay.**

393 Proteins were produced *in vitro* using the TNT SP6 Quick Coupled Transcription/Translation  
394 System (Promega) according to the manufacturer's instructions and used directly without  
395 freezing and thawing. The composition of the protein-DNA binding reaction buffer was  
396 essentially as described<sup>37</sup>, with final concentration of 1.6 mM EDTA, 10.3 mM HEPES,  
397 1 mM DTT, 1.3 mM spermidine, 33.3 ng/ $\mu$ l Poly dI/dC, 2.5 % CHAPS, 4.3 % glycerol, and a  
398 minimum of 1.3  $\mu$ g/ $\mu$ l BSA. The amounts of protein, DNA probe and BSA were varied  
399 according to the performed assay. For cooperative DNA-binding studies to infer tetramer



400 formation capabilities a constant amount of 0.1 ng of a DNA probe containing two CARG-  
401 boxes in a distance of six helical turns was co-incubated with variable amounts of *in vitro*  
402 translated protein ranging from 0.05  $\mu$ l to 3  $\mu$ l. Variable amounts of applied *in vitro* translated  
403 protein were compensated by adding appropriate volumes of BSA (10  $\mu$ g/ $\mu$ l). For saturation  
404 binding assays to quantify dimer binding affinities a constant amount of 2 to 5  $\mu$ l *in vitro*  
405 translated protein was co-incubated with variable amounts of a DNA probe containing one  
406 CARG-box in the center, ranging from 0.05 to 32 ng as previously described in <sup>12</sup>. Binding  
407 reactions had a total volume of 12  $\mu$ l, were incubated overnight at 4°C and subsequently  
408 loaded on a polyacrylamide (5 % acrylamide, 0.1725 % bisacrylamid) 0.5x TBE gel that has  
409 been pre-run for 30 min. The gel was run with 0.5x TBE buffer for 2.5 h at 7.5 V/cm and  
410 afterwards dried and exposed onto a phosphorimaging screen to quantify signal intensities.

### 411 **Quantification of cooperative DNA-binding.**

412 For each lane of the EMSA gel relative signal intensities of all fractions were measured using  
413 Multi Gauge 3.1 (Fujifilm). The equations that were used to quantify the ability for  
414 cooperative DNA-binding of two dimers to a DNA probe carrying two CARG-boxes have  
415 been described previously <sup>6, 38</sup>. Briefly, if the relative concentration of unbound DNA probe  
416 [Y<sub>0</sub>] (signal of high electrophoretic mobility), a DNA probe bound by two proteins [Y<sub>2</sub>]  
417 (signal of intermediate electrophoretic mobility), and a DNA probe bound by four proteins  
418 [Y<sub>4</sub>] (signal of low electrophoretic mobility) are described as a function of applied protein  
419 [P<sub>2</sub>],

$$420 \quad [Y_0] = \frac{1}{1 + \left(\frac{2}{k_{d1}}\right) \times [P_2] + \left(\frac{1}{k_{d1} \times k_{d2}}\right) \times [P_2]^2} \quad (1)$$

$$421 \quad [Y_2] = \frac{\left(\frac{2}{k_{d1}}\right) \times [P_2]}{1 + \left(\frac{2}{k_{d1}}\right) \times [P_2] + \left(\frac{1}{k_{d1} \times k_{d2}}\right) \times [P_2]^2} \quad (2)$$

$$422 \quad [Y_4] = \frac{\left(\frac{1}{k_{d1} \times k_{d2}}\right) \times [P_2]^2}{1 + \left(\frac{2}{k_{d1}}\right) \times [P_2] + \left(\frac{1}{k_{d1} \times k_{d2}}\right) \times [P_2]^2} \quad (3)$$

423 then  $k_{d1}$  is the dissociation constant for binding of a protein dimer to a DNA probe with two  
424 unoccupied binding sites and  $k_{d2}$  is the dissociation constant for binding of a second protein  
425 dimer to a DNA probe where one of the two binding sites is already occupied. By nonlinear  
426 regression of the measured signal intensities of the three fractions to equation (1) to (3),  $k_{d1}$

427 and  $k_{d2}$  were estimated using GraphPad Prism 5 (GraphPad Software). As we used *in vitro*  
428 transcription/translation for protein production, the exact protein concentrations were  
429 unknown. Therefore the amount of applied *in vitro* transcription/translation mixture was used  
430 as proxy for [P2], as previously described<sup>6</sup>. As a result of the unknown protein concentrations  
431 the estimated values for  $k_{d1}$  and  $k_{d2}$  depend on the *in vitro* transcription/translation efficiency  
432 and can only be considered as relative values. However, estimating a cooperativity constant  
433  $k_{coop}$  (defined as the ratio of  $k_{d1}$  and  $k_{d2}$ ) is still possible:

$$434 \quad k_{coop} = \frac{k_{d1}}{k_{d2}} \quad (4)$$

435 As described earlier,  $k_{coop}$  values of  $\approx 200$  were the upper limit that could be determined with  
436 our experimental setup<sup>12</sup>.

437 **Saturation binding assay.** To estimate the dissociation constant for binding of a protein  
438 dimer to a single DNA-binding site  $k_d$ , saturation binding assays with a DNA probe carrying a  
439 single CArG-box were performed. The equation that was used to infer  $k_d$  has been described  
440 previously<sup>12</sup>.  $k_d$  can be defined as

$$441 \quad k_d = \frac{([P_t] - [PD]) \times [D]}{[PD]} \quad (5)$$

442 with [PD], [P<sub>t</sub>], and [D] being the concentration of the protein-DNA complex, total protein,  
443 and unbound DNA probe, respectively. By expressing [PD] as a function of [D] for increasing  
444 concentrations of applied DNA probe, [P<sub>t</sub>] and  $k_d$  were determined via nonlinear regression  
445 using GraphPad Prism 5.

#### 446 **Multiple sequence alignments and *in silico* sequence analysis.**

447 For analyses on amino acid preferences of different MIKC-type MADS-domain protein  
448 subfamilies throughout the K-domain a comprehensive sequence collection was compiled.  
449 Via BLAST search<sup>39</sup> representatives of all 14 subfamilies<sup>40,41</sup> of MIKC-type proteins present  
450 in *A. thaliana* (AP1-, AP3-, PI-, AG-, ABS-, SEP3-, LOFSEP-, AGL6-, AGL12-, AGL15-,  
451 AGL17-, FLC-, TM3-, and SVP-subfamily) were collected using the amino acid sequences of  
452 *A. thaliana* AP1, AP3, PI, AG, ABS, SEP3, SEP1, AGL6, AGL12, AGL15, AGL17, FLC,  
453 SOC1, and SVP, respectively, as query. To cover a broad set of species, six individual  
454 searches were performed for each subfamily. Each of those searches was restricted to a  
455 different group of seed plants: core eudicots, early diverging eudicots, monocots, magnoliids,

456 early diverging angiosperms, and gymnosperms. For sequences from core eudicots the search  
457 queries were restricted to asterids (BLAST tax-ID: 71274), Dilleniaceae (24942),  
458 Caryophyllidea (108240), Santalales (41947), Berberidopsidales (403664), Saxifragales  
459 (41946), rosids (71275), and Gunnerales (232382); for sequences from early diverging  
460 eudicots the search queries were restricted to Proteales (232378), Buxales (280577), and  
461 Ranunculales (41768); for sequences from monocots and magnoliids, respectively, the queries  
462 were restricted to the corresponding predefined organism groups implemented in BLAST  
463 (tax-ID: 4447 and 232347, respectively); for sequences from early diverging angiosperms the  
464 queries were restricted to Austrobaileyales (82956), Hydatellaceae (178426), Nymphaeales  
465 (261007), and Amborella (13332); and for sequences from gymnosperms the queries were  
466 restricted to Gnetales (3378), Pinaceae (3318), Taxaceae (25623), Cephalotaxus (50178),  
467 Cupressaceae (3367), Araucariaceae (25664), Podocarpaceae (3362), Ginkgoales (3308), and  
468 Cycadales (3297). For each of the 84 resulting BLAST searches the amino acid sequences of  
469 all hits were downloaded (if more than 100 sequences were found, only top 100 hits according  
470 to the total score calculated by BLAST were downloaded). The results of all BLAST searches  
471 were combined into a single data set, all completely redundant sequences as well as all  
472 sequences that did not constitute MIKC-type proteins were removed and the remaining  
473 sequences were aligned with Mafft applying E-INS-i mode using Jalview<sup>42, 43</sup>. The subfamily  
474 assignment of each sequence was performed according to its clustering within a phylogenetic  
475 tree calculated with MrBayes (based on MADS-, I- and K-domain sequences, applying mixed  
476 AA model with 20 million generations, 50% burn-in, and a sample frequency of 1000)<sup>44</sup>. All  
477 sequences with uncertain subfamily assignment were removed. To optimize the alignment  
478 quality of the K-domain 133 further sequences were removed that produced gaps and that did  
479 not appear to be representative for the respective subfamily. The final sequence collection  
480 comprised 1325 MIKC-type protein sequences.

481 Relative sequence similarities at homologous sites were calculated with R ([https://www.R-](https://www.R-project.org/)  
482 [project.org/](https://www.R-project.org/)). Each pair of amino acids at equivalent sites were assigned a similarity score  
483 based on BLOSUM40 values normalized to 1. Subsequently, all pairwise similarity scores  
484 were averaged to calculate the mean relative sequence similarity for all amino acid positions  
485 within the K-domain. BLOSUM40 was chosen because the average sequence identity within  
486 the K-domain of all examined sequences was about 40 %. Box-plots and line graphs of  
487 sequence similarity scores were created with SPSS (IBM). Statistical significance of sequence  
488 similarity differences were tested via Mann-Whitney U-tests implemented in SPSS.

489 Subfamily specific amino acid frequencies and mean hydrophobicity values for positions  
490 within the K-domain were calculated with R. SEP3 K-domain crystal structure pictures were  
491 created with Swiss-PdbViewer (SIB). Helical wheel diagrams were created with R. Coiled-  
492 coil predictions to preselect potential positions for single and double amino acid substitutions  
493 were performed with COILS <sup>45</sup>.

#### 494 **ACKNOWLEDGEMENTS**

495 We are grateful to Fredo-Torpedo (Fred Ferber), Chris-Master (Christian Gafert) and Tanja  
496 Schulze for valuable help with some experiments. This research was supported by the DFG  
497 (Deutsche Forschungsgemeinschaft) grant to G.T. and R.M. (TH417/5-3). R.M. received a  
498 post-doctoral fellowship from the Carl Zeiss Foundation.

#### 499 **AUTHOR CONTRIBUTIONS**

500 G.T., R.M. and F.R. designed the study. F.R. performed the experiments. G.T., R.M. and F.R.  
501 wrote the manuscript.

#### 502 **COMPETING FINANCIAL INTEREST**

503 The authors declare no competing financial interests.

504 **REFERENCES**

- 505 1. Remenyi A, Scholer HR, Wilmanns M. Combinatorial control of gene expression. *Nat Struct*  
506 *Mol Biol* **11**, 812-815 (2004).
- 507  
508 2. Coen ES, Meyerowitz EM. The war of the whorls: genetic interactions controlling flower  
509 development. *Nature* **353**, 31-37 (1991).
- 510  
511 3. Ditta G, Pinyopich A, Robles P, Pelaz S, Yanofsky MF. The SEP4 gene of Arabidopsis thaliana  
512 functions in floral organ and meristem identity. *Curr Biol* **14**, 1935-1940 (2004).
- 513  
514 4. Pelaz S, Ditta GS, Baumann E, Wisman E, Yanofsky MF. B and C floral organ identity functions  
515 require SEPALLATA MADS-box genes. *Nature* **405**, 200-203 (2000).
- 516  
517 5. Melzer R, Theißen G. Reconstitution of 'floral quartets' in vitro involving class B and class E  
518 floral homeotic proteins. *Nucleic Acids Res* **37**, 2723-2736 (2009).
- 519  
520 6. Melzer R, Verelst W, Theißen G. The class E floral homeotic protein SEPALLATA3 is sufficient  
521 to loop DNA in 'floral quartet'-like complexes in vitro. *Nucleic Acids Res* **37**, 144-157 (2009).
- 522  
523 7. Theißen G, Saedler H. Plant biology. Floral quartets. *Nature* **409**, 469-471 (2001).
- 524  
525 8. Immink RGH, *et al.* SEPALLATA3: the 'glue' for MADS box transcription factor complex  
526 formation. *Genome Biol* **10**, R24 (2009).
- 527  
528 9. Smaczniak C, *et al.* Characterization of MADS-domain transcription factor complexes in  
529 Arabidopsis flower development. *Proc Natl Acad Sci USA* **109**, 1560-1565 (2012).
- 530  
531 10. Zahn LM, *et al.* The evolution of the SEPALLATA subfamily of MADS-Box genes: A  
532 preangiosperm origin with multiple duplications throughout angiosperm history. *Genetics*  
533 **169**, 2209-2223 (2005).
- 534  
535 11. Favaro R, *et al.* MADS-box protein complexes control carpel and ovule development in  
536 Arabidopsis. *Plant Cell* **15**, 2603-2611 (2003).
- 537  
538 12. Jetha K, Theißen G, Melzer R. Arabidopsis SEPALLATA proteins differ in cooperative DNA-  
539 binding during the formation of floral quartet-like complexes. *Nucleic Acids Res* **42**, 10927-  
540 10942 (2014).
- 541  
542 13. Liu C, Xi W, Shen L, Tan C, Yu H. Regulation of floral patterning by flowering time genes. *Dev*  
543 *Cell* **16**, 711-722 (2009).

544

- 545 14. Lopez-Vernaza M, Yang SX, Muller R, Thorpe F, de Leau E, Goodrich J. Antagonistic roles of  
546 SEPALLATA3, FT and FLC genes as targets of the polycomb group gene CURLY LEAF. *Plos One*  
547 **7**, e30715 (2012).
- 548  
549 15. Melzer R, *et al.* DEF- and GLO-like proteins may have lost most of their interaction partners  
550 during angiosperm evolution. *Ann Bot* **114**, 1431-1443 (2014).
- 551  
552 16. Yang YZ, Fanning L, Jack T. The K domain mediates heterodimerization of the Arabidopsis  
553 floral organ identity proteins, APETALA3 and PISTILLATA. *Plant J* **33**, 47-59 (2003).
- 554  
555 17. Yang YZ, Jack T. Defining subdomains of the K domain important for protein-protein  
556 interactions of plant MADS proteins. *Plant Mol Biol* **55**, 45-59 (2004).
- 557  
558 18. Riechmann JL, Meyerowitz EM. MADS domain proteins in plant development. *Biol Chem* **378**,  
559 1079-1101 (1997).
- 560  
561 19. Parry DA, Fraser RD, Squire JM. Fifty years of coiled-coils and alpha-helical bundles: a close  
562 relationship between sequence and structure. *J Struct Biol* **163**, 258-269 (2008).
- 563  
564 20. Mason JM, Arndt KM. Coiled coil domains: Stability, specificity, and biological implications.  
565 *ChemBiochem* **5**, 170-176 (2004).
- 566  
567 21. Mason JM, Hagemann UB, Arndt KM. Role of hydrophobic and electrostatic interactions in  
568 coiled coil stability and specificity. *Biochemistry* **48**, 10380-10388 (2009).
- 569  
570 22. Betz SF, Bryson JW, Degrado WF. Native-like and structurally characterized designed alpha-  
571 helical bundles. *Curr Opin Struc Biol* **5**, 457-463 (1995).
- 572  
573 23. Puranik S, *et al.* Structural basis for the oligomerization of the MADS domain transcription  
574 factor SEPALLATA3 in Arabidopsis. *Plant Cell* **26**, 3603-3615 (2014).
- 575  
576 24. Nilsson I, Saaf A, Whitley P, Gafvelin G, Waller C, von Heijne G. Proline-induced disruption of  
577 a transmembrane alpha-helix in its natural environment. *J Mol Biol* **284**, 1165-1175 (1998).
- 578  
579 25. Richardson JS. The anatomy and taxonomy of protein structure. *Adv Protein Chem* **34**, 167-  
580 339 (1981).
- 581  
582 26. Kim S, Soltis PS, Soltis DE. AGL6-like MADS-box genes are sister to AGL2-like MADS-box  
583 genes. *J Plant Biol* **56**, 315-325 (2013).
- 584  
585 27. Zhu BY, Zhou NE, Kay CM, Hodges RS. Packing and hydrophobicity effects on protein folding  
586 and stability - effects of beta-branched amino-acids, valine and isoleucine, on the formation

- 587 and stability of 2-stranded alpha-helical coiled coils leucine zippers. *Protein Sci* **2**, 383-394  
588 (1993).
- 589  
590 28. de Folter S, *et al.* Comprehensive interaction map of the Arabidopsis MADS Box transcription  
591 factors. *Plant Cell* **17**, 1424-1433 (2005).
- 592  
593 29. Moitra J, Szilak L, Krylov D, Vinson C. Leucine is the most stabilizing aliphatic amino acid in  
594 the d position of a dimeric leucine zipper coiled coil. *Biochemistry* **36**, 12567-12573 (1997).
- 595  
596 30. Theißen G, Melzer R, Rümpler F. MADS-domain transcription factors and the floral quartet  
597 model of flower development: linking plant development and evolution. *Development* **143**,  
598 3259-3271 (2016).
- 599  
600 31. Takei T, *et al.* The effects of the side chains of hydrophobic aliphatic amino acid residues in  
601 an amphipathic polypeptide on the formation of a helix and its association. *J Biochem* **139**,  
602 271-278 (2006).
- 603  
604 32. Kaufmann K, Melzer R, Theißen G. MIKC-type MADS-domain proteins: structural modularity,  
605 protein interactions and network evolution in land plants. *Gene* **347**, 183-198 (2005).
- 606  
607 33. Ma H, Yanofsky MF, Meyerowitz EM. AGL1-AGL6, an Arabidopsis gene family with similarity  
608 to floral homeotic and transcription factor genes. *Genes Dev* **5**, 484-495 (1991).
- 609  
610 34. Fong JH, Keating AE, Singh M. Predicting specificity in bZIP coiled-coil protein interactions.  
611 *Genome Biol* **5**, R11 (2004).
- 612  
613 35. Potapov V, Kaplan JB, Keating AE. Data-driven prediction and design of bZIP coiled-coil  
614 interactions. *Plos Comput Biol* **11**, (2015).
- 615  
616 36. Perez K, Yeam I, Jahn MM, Kang BC. Megaprimer-mediated domain swapping for  
617 construction of chimeric viruses. *J Virol Methods* **135**, 254-262 (2006).
- 618  
619 37. Egea-Cortines M, Saedler H, Sommer H. Ternary complex formation between the MADS-box  
620 proteins SQUAMOSA, DEFICIENS and GLOBOSA is involved in the control of floral architecture  
621 in *Antirrhinum majus*. *Embo J* **18**, 5370-5379 (1999).
- 622  
623 38. Senear DF, Brenowitz M. Determination of binding constants for cooperative site-specific  
624 protein-DNA interactions using the gel mobility-shift assay. *J Biol Chem* **266**, 13661-13671  
625 (1991).
- 626  
627 39. Altschul SF, Gish W, Miller W, Myers EW, Lipman DJ. Basic local alignment search tool. *J Mol*  
628 *Biol* **215**, 403-410 (1990).
- 629



- 630 40. Becker A, Theißen G. The major clades of MADS-box genes and their role in the development  
631 and evolution of flowering plants. *Mol Phylogenet Evol* **29**, 464-489 (2003).
- 632  
633 41. Gramzow L, Theißen G. Phylogenomics of MADS-Box genes in plants - two opposing life styles  
634 in one gene family. *Biology (Basel)* **2**, 1150-1164 (2013).
- 635  
636 42. Waterhouse AM, Procter JB, Martin DMA, Clamp M, Barton GJ. Jalview Version 2-a multiple  
637 sequence alignment editor and analysis workbench. *Bioinformatics* **25**, 1189-1191 (2009).
- 638  
639 43. Katoh K, Standley DM. MAFFT multiple sequence alignment software version 7:  
640 improvements in performance and usability. *Mol Biol Evol* **30**, 772-780 (2013).
- 641  
642 44. Huelsenbeck JP, Ronquist F. MRBAYES: Bayesian inference of phylogenetic trees.  
643 *Bioinformatics* **17**, 754-755 (2001).
- 644  
645 45. Lupas A, Van Dyke M, Stock J. Predicting coiled coils from protein sequences. *Science* **252**,  
646 1162-1164 (1991).

647 **FIGURES**

648

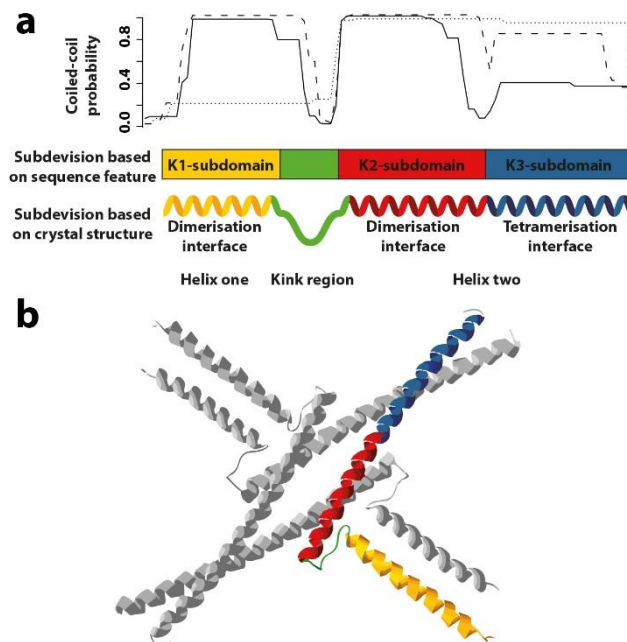

649

650 **Figure 1. Domain architecture of the K-domain of SEP3 based on sequence and**  
651 **structural features. (a)** Based on coiled-coil predictions (top) the K-domain was assumed to  
652 fold into three separate coiled-coils and was thus subdivided into three subdomains K1-, K2-  
653 and K3-subdomain (middle). The crystal structure of the K-domain of SEP3 revealed that it  
654 folds into two  $\alpha$ -helices separated by a kink region (bottom). The first helix spans the K1-  
655 subdomain (color coded in yellow) and is involved in the dimerisation of two SEP3  
656 monomers (i.e. dimerisation interface). The second helix spans the K2- and K3-subdomains  
657 and constitutes an N-terminal interaction interface that further stabilizes dimerisation of two  
658 SEP3 monomers (red) and a second C-terminal interaction interface that mediates the  
659 interaction of two SEP3 dimers (i.e. tetramerisation interface, blue). Coiled-coil predictions  
660 were performed with COILS<sup>45</sup>. The solid, dashed and dotted lines correspond to a sliding  
661 window size of 14, 21 and 28 amino acids used for the prediction, respectively. (b) Crystal  
662 structure of a SEP3 K-domain homotetramer<sup>23</sup>. The dimerisation interface of helix one, the  
663 kink region, the dimerisation interface of helix two and the tetramerisation interface of one K-  
664 domain are color coded in yellow, green, red and blue, respectively.

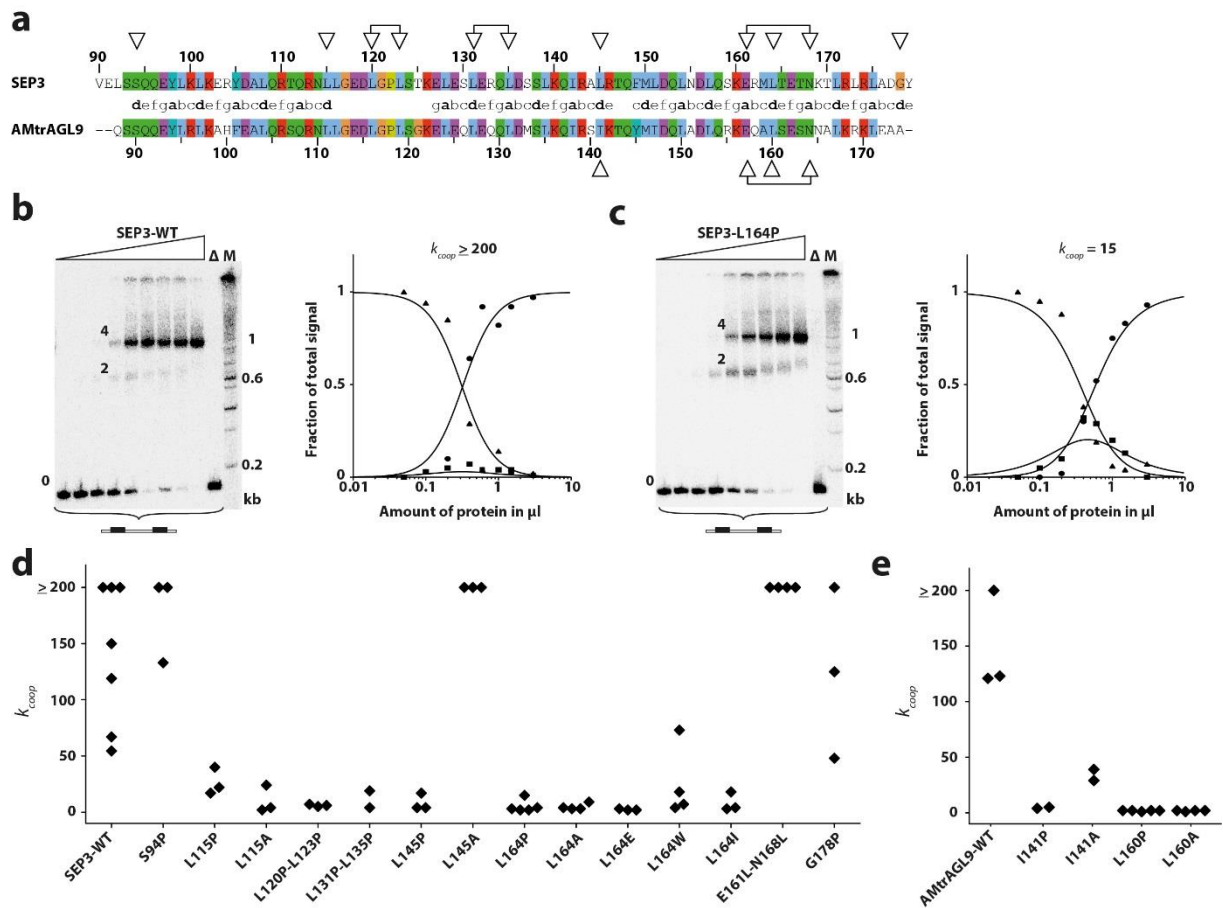

665

666 **Figure 2. Ability of SEP3 and AMtrAGL9 wild type proteins and different amino acid**  
 667 **substitution mutants to cooperatively bind to DNA.** (a) Pairwise sequence alignment of the  
 668 K-domains of SEP3 and AMtrAGL9. The heptad repeat pattern is depicted in the center.  
 669 Positions at which amino acids were substituted are indicated by open triangles. (b and c)  
 670 Binding of SEP3 wild type (b) and SEP3-L164P (c) to a DNA probe containing two CArG-  
 671 boxes. Increasing amounts of *in vitro* translated protein were incubated with constant amounts  
 672 of DNA probe. As negative control the empty pTNT vector without any cDNA insert was  
 673 used as template DNA for the *in vitro* translation (lane  $\Delta$ ). For size comparison a radioactively  
 674 labeled DNA ladder (100 bp Ladder, NEB) was applied (lane M). The labeling of the three  
 675 different fractions '0', '2' and '4' corresponds to the number of proteins bound to one DNA  
 676 molecule. Quantified signal intensities of the different fractions and graphs, fitted according  
 677 to equation (1) to (3) described in Methods, are shown next to the gel pictures ( $\blacktriangle$  free DNA;  
 678  $\blacksquare$  DNA probe bound by two proteins;  $\bullet$  DNA probe bound by four proteins). The  $k_{coop}$  value  
 679 inferred from this particular measurement is depicted above the diagram. (d and e)  $k_{coop}$   
 680 values for the wild type protein and all examined single and double amino acid substitution  
 681 mutants of SEP3 (d) and AMtrAGL9 (e).  $k_{coop}$  values above 200 could not be determined  
 682 reliably (see Methods).

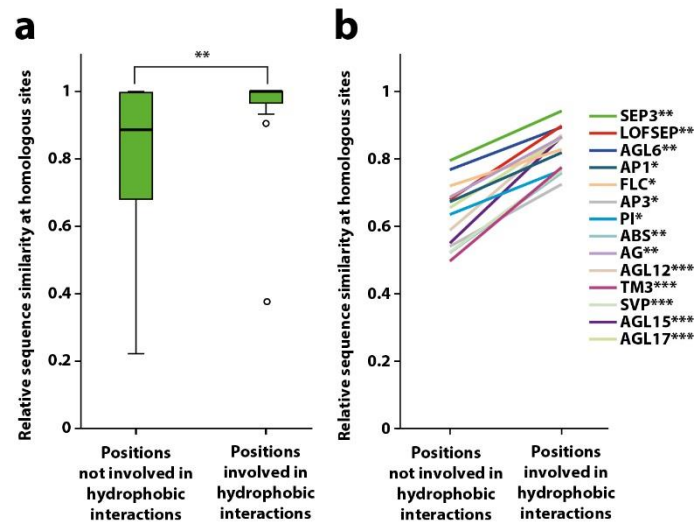

683

684 **Figure 3. Sequence similarity analysis of SEP3-subfamily proteins and members of other**  
685 **MIKC-type MADS-domain protein subfamilies. (a)** Box-plot showing relative sequence  
686 similarity at homologous sites of SEP3-subfamily proteins for positions that are involved in  
687 hydrophobic interactions within the SEP3 homotetramer and positions that are not involved in  
688 hydrophobic interactions. **(b)** Line graph showing the same analysis as in **(a)** but for all  
689 MIKC-type protein subfamilies. For all subfamilies amino acid positions that are homologous  
690 to sites involved in hydrophobic interactions are significantly less variable than positions that  
691 are homologous to non-interacting sites (Mann-Whitney-U-test; \* p = 0.01-0.05;  
692 \*\* p = 0.001-0.01; \*\*\* p < 0.001).

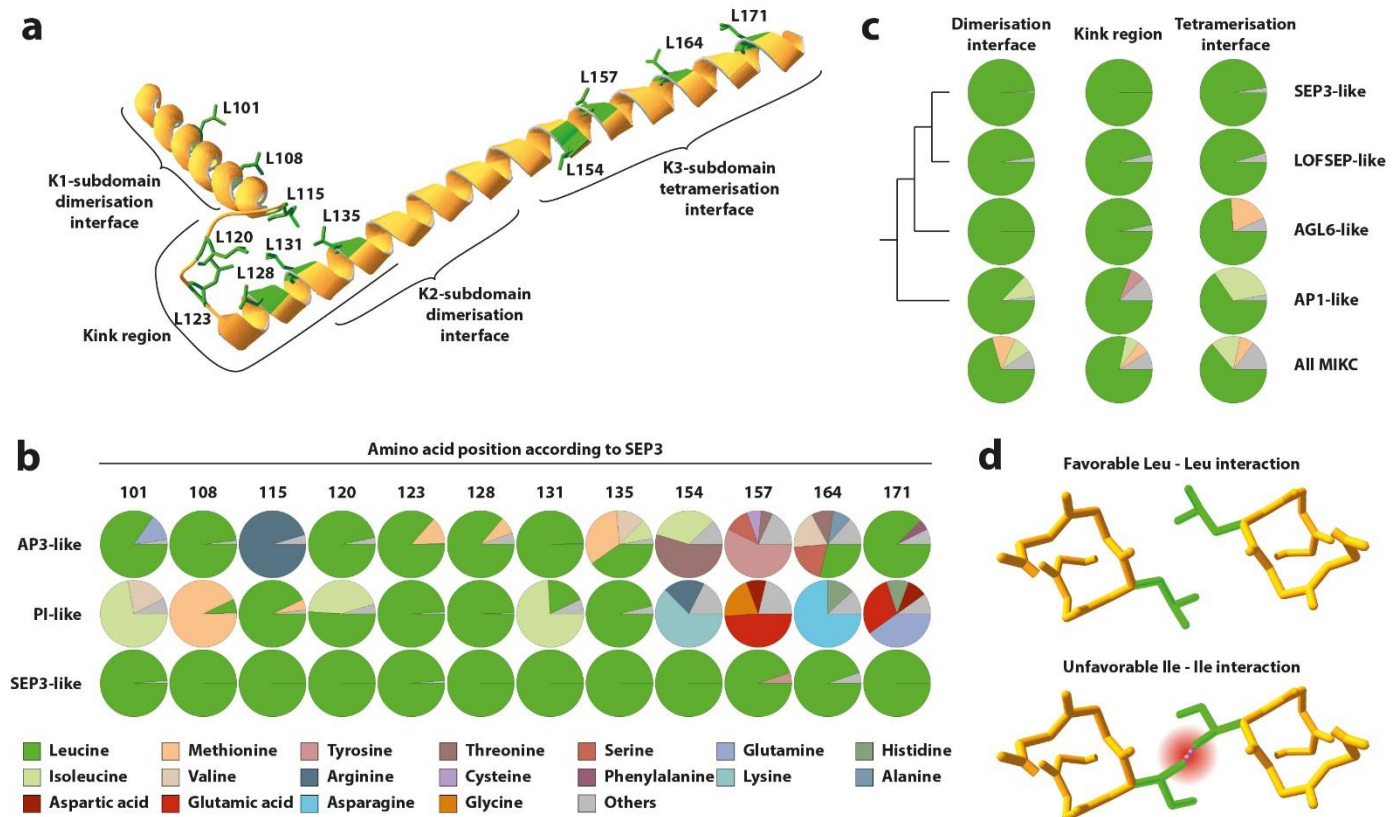

693 **Figure 4. Amino acid preferences of SEP3-subfamily proteins and members of other**  
 694 **MIKC-type MADS-domain protein subfamilies.** (a) Picture of the crystal structure of a  
 695 single K-domain of SEP3. Leucine side chains that are involved in inter- and intramolecular  
 696 interactions are shown in green. (b) Amino acid frequencies at sites homologous to leucine  
 697 residues that are involved in inter- and intramolecular interactions in the SEP3 homotetramer  
 698 shown for SEP3-, AP3- and PI-subfamily proteins. Amino acids that occurred in less than 5 %  
 699 of the examined subset of sequences were condensed as 'others'. The vast majority of the  
 700 positions shown vertically are homologous to each other. The only exception are positions  
 701 154, 157, 164 and 171 of PI-like proteins. In this case, a gap was detected in the alignment but  
 702 amino acids directly following the gap were included here. (c) Amino acid preferences at sites  
 703 homologous to leucine residues that contribute to dimerisation interface (L101, L108), kink  
 704 region (L115, L120, L123, L128, L131, L135) and tetramerisation interface (L154, L157,  
 705 L164, L171) in the SEP3 homotetramer, shown for SEP3-, LOFSEP-, AGL6- and AP1-  
 706 subfamily proteins and all MIKC-type proteins, respectively, following the color coding of  
 707 panel B. (d) Part of the crystal structure of two interacting tetramerisation interfaces within a  
 708 SEP3 homotetramer. The picture illustrates the favorable Leu-Leu interaction at heptad repeat  
 709 'd' positions as it becomes apparent several times within a SEP3 homotetramer (upper part).  
 710 In contrast to the  $\gamma$ -branched leucine a  $\beta$ -branched amino acid such as isoleucine would  
 711 potentially lead to steric hindrance at heptad repeat 'd' positions (lower part).



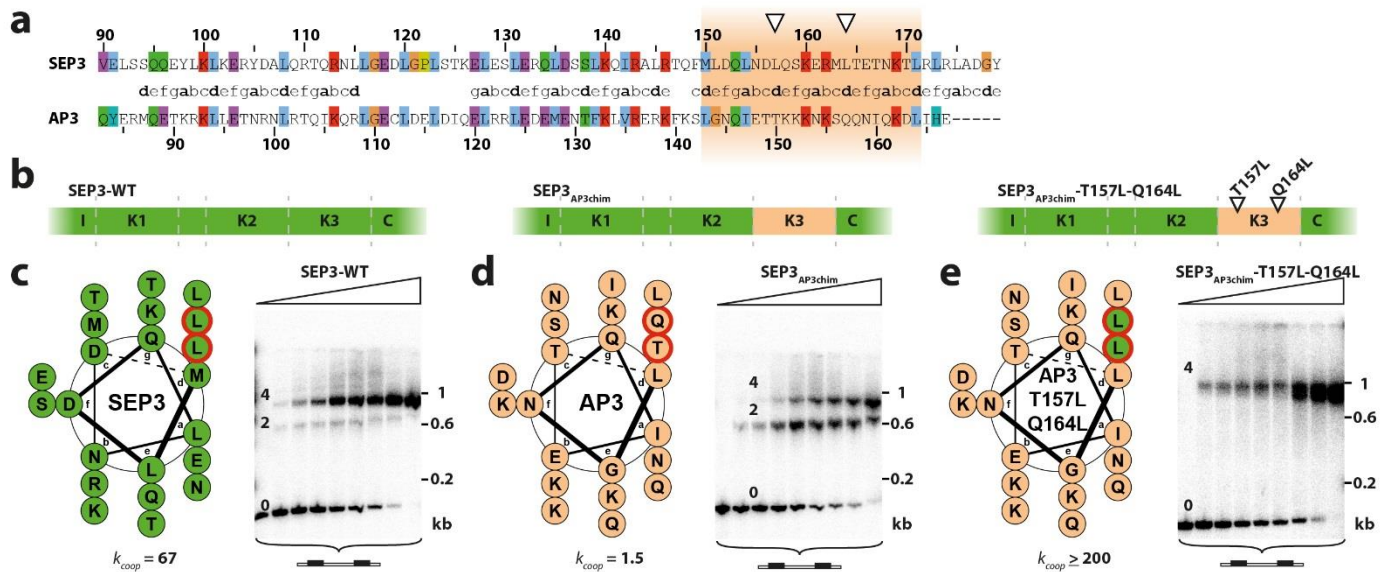

712

713 **Figure 5. Design and cooperative DNA-binding capabilities of the chimeric protein**  
 714 **SEP3<sub>AP3chim</sub>.** (a) Pairwise sequence alignment of the K-domains of SEP3 and AP3. The  
 715 heptad repeat pattern is depicted in the center. Orange background marks the region that was  
 716 substituted to create the chimeric protein SEP3<sub>AP3chim</sub>. Open triangles mark the positions of  
 717 the subsequently introduced amino acid substitutions. (b) Experimental setup to test for the  
 718 ability of leucines to restore tetramerisation ability of SEP3<sub>AP3chim</sub>. First the complete  
 719 tetramerisation interface (i.e. the K3-subdomain) of SEP3 was substituted by the equivalent  
 720 positions of AP3. Subsequently the two residues T157 and Q164 were substituted back to  
 721 leucine to reestablish the hydrophobic stripe. (c-e, left) Helical wheel diagram of the  
 722 tetramerisation interface of SEP3 wild type (c), SEP3<sub>AP3chim</sub> (d) and SEP3<sub>AP3chim</sub>-T157L-  
 723 Q164L (e), respectively, to illustrate the presumed position of amino acids 157 and 164  
 724 (framed in red) within the hydrophobic stripe of the K3-subdomain coiled-coil. (c-e, right)  
 725 Binding of SEP3 wild type (c), SEP3<sub>AP3chim</sub> (d) and SEP3<sub>AP3chim</sub>-T157L-Q164L (e) to a DNA  
 726 probe containing two CArG-boxes. Increasing amounts of *in vitro* translated protein were  
 727 incubated together with constant amounts of DNA probe.  $k_{coop}$  values inferred from this  
 728 particular measurement are depicted below the helical wheel diagrams.
